# Supplementary material for: Heparan sulfate-dependent phase separation of CCL5 and its chemotactic activity
Source: eLife journal article supplement (doi:10.7554/elife.93871), 2024-03-04
Supplement: fig1-data1 [file Figure 1-source data 1.xlsx]

## Sheet: Sheet1
							Figure 1-Source Data 1
							Figure 1B Turbidity changes with increase of heparin concentration were measured at 620 nm
							Source Data
								CCL5:Heparin
							Replicate	0	20:1	5:1	1:2	1:20	1:50
							1	0.0116333	0.0459333	0.160133	0.278833	0.201533	0.0852333
							2	0.00133333	0.0494333	0.161133	0.280733	0.200433	0.0851333
							3	0.00183333	0.0467333	0.162433	0.268933	0.206133	0.0861333
							Descriptive statistics(arithmetic from GraphPad Prism8)
								CCL5:Heparin
								0	20:1	5:1	1:2	1:20	1:50
							Number of values	3	3	3	3	3	3
							Minimum	0.0013	0.0459	0.1601	0.2689	0.2004	0.0851
							Maximum	0.0116	0.0494	0.1624	0.2807	0.2061	0.0861
							Range	0.0103	0.0035	0.0023	0.0118	0.0057	0.001
							Mean	0.0049	0.04733	0.1612	0.2761	0.2027	0.08547
							Std. Deviation	0.005808	0.001834	0.001153	0.006336	0.003024	0.0005508
							Std. Error of Mean	0.003353	0.001059	0.0006658	0.003658	0.001746	0.000318
