# Supplementary material for: Heparan sulfate-dependent phase separation of CCL5 and its chemotactic activity
Source: eLife journal article supplement (doi:10.7554/elife.93871), 2024-03-04
Supplement: fig1-data2 [file Figure 1-source data 2.xlsx]

## Sheet: Sheet1
						Figure-Source Data 2
						Figure 1D Representative FRAP results of droplets formed by CCL5-Cy3 and heparin
						Source Data
						Replicate	1	2	3
						Time(s)	Fluorescence recovery
						0	100	100	100
						2.594	0	0	0
						3.89	-0.50244	4.315	-1.29496
						5.186	1.75954	10.4278	1.47182
						6.482	0.562555	4.46394	-1.15792
						7.777	3.48817	5.13552	5.30847
						9.073	2.82217	9.37419	0.931398
						10.369	2.93301	5.68643	0.908289
						11.665	3.42887	6.48278	3.91882
						12.96	1.18559	10.6208	-1.26269
						14.256	5.94026	7.60473	-1.98266
						15.552	5.24334	11.2885	3.43098
						16.847	6.63169	4.56847	-0.90316
						18.143	5.84635	5.56984	0.748138
						19.439	5.37319	9.47081	0.099235
						20.735	8.75969	2.06707	-0.07107
						22.03	6.73507	10.5767	0.344794
						23.326	8.21754	7.80587	0.549705
						24.622	7.80776	9.4145	2.04547
						25.918	9.00378	9.90116	1.39333
						27.213	9.17141	12.5272	2.53746
						28.509	7.85581	10.641	0.001856
						29.805	10.4071	9.68383	1.32455
						31.1	12.2217	6.95742	3.08807
						32.396	9.63428	2.54573	0.899993
						33.692	11.6996	11.2364	2.09161
						34.988	12.9468	11.6546	2.24438
						36.283	11.7756	4.46012	0.827503
						37.579	14.0839	7.82607	-0.41306
						38.875	15.9699	8.11577	1.83961
						40.171	12.7989	8.92005	4.32631
						41.466	12.1989	12.837	3.06358
						42.762	13.1878	13.6897	6.99481
						44.058	12.9756	13.9711	3.58046
						45.353	12.9884	11.6145	2.01774
						46.649	11.6069	9.12112	7.25787
						47.945	14.2925	11.5542	4.10797
						49.241	16.7109	12.5515	0.413496
						50.536	16.0859	12.6118	6.24114
						51.832	13.3431	11.2526	5.71592
						53.128	11.9497	15.5717	3.22694
						54.424	14.3969	10.8625	7.9686
						55.719	14.9571	13.6897	6.38513
						57.015	17.6544	12.6883	3.47937
						58.311	19.278	11.3169	0.821935
						59.607	16.2139	17.4257	5.05916
						60.902	19.2163	15.2218	4.91564
						62.198	17.4463	15.1213	2.0911
						63.494	21.2307	16.2876	0.182712
						64.789	17.3104	19.4806	8.5381
						66.085	21.6751	18.8533	5.17452
						67.381	25.924	19.3922	4.53529
						68.677	24.915	22.0786	4.62714
						69.972	25.9555	22.163	5.133
						71.268	26.7521	20.5705	6.04263
						72.564	26.5881	24.761	8.36684
						73.86	26.882	19.9271	2.49535
						75.155	26.3416	14.5261	6.87155
						76.451	27.1591	18.797	4.07008
						77.747	26.546	21.375	4.69683
						79.042	25.3009	17.9405	4.08253
						80.338	27.9426	23.6551	11.3649
						81.634	29.7114	23.064	6.16075
						82.93	30.0575	22.8549	7.32333
						84.225	29.5679	19.2314	6.42705
						85.521	27.4272	21.1014	9.4883
						86.817	31.4844	24.749	3.38377
						88.113	33.1343	22.6819	2.78378
						89.408	31.091	24.4313	3.59101
						90.704	31.7199	21.0813	3.37915
						92	34.8527	21.391	6.03797
						93.295	31.164	20.824	8.09589
						94.591	31.5439	22.1551	2.91071
						95.887	36.8233	21.942	5.30555
						97.183	34.9852	23.3012	2.60056
						98.478	34.8905	21.1055	5.4998
						99.774	33.1305	23.257	3.23512
						101.07	33.0159	22.0104	3.51758
						102.366	37.958	25.6862	2.16715
						103.661	35.6359	22.5091	5.0346
						104.957	38.0537	23.237	5.05861
						106.253	34.5804	23.43	3.23141
						107.548	40.0423	24.7169	6.2987
						108.844	39.1192	21.3188	7.87063
						110.14	38.2236	25.5575	5.83441
						111.436	36.2369	22.1754	4.01372
						112.731	40.6611	24.7049	3.96892
						114.027	40.0397	25.7345	3.90662
						115.323	39.9702	24.9664	6.64022
						116.619	41.1867	20.4622	6.001
						117.914	45.6988	22.2437	8.68846
						119.21	40.8635	26.7117	7.66525
						120.506	43.703	22.7867	8.76735
						121.802	44.3416	26.3216	3.00295
						123.097	44.5775	30.8861	6.81282
						124.393	44.9052	27.6409	7.09713
						125.689	47.2196	22.7385	4.91091
						126.984	44.7517	30.2468	8.96767
						128.28	46.3313	28.5778	12.6566
						129.576	47.5962	30.1985	11.9325
						130.872	45.2722	30.3031	10.2073
						132.167	45.1116	30.5162	15.3542
						133.463	46.8149	29.1892	9.85795
						134.759	47.9189	28.1073	15.4968
						136.055	48.6504	32.4305	15.4918
						137.35	48.1062	26.4264	13.9683
						138.646	49.979	28.6783	11.4991
						139.942	49.5799	28.5334	12.6986
						141.237	47.7686	31.5537	12.6705
						142.533	48.7212	26.6715	15.7498
						143.829	48.4438	28.7103	16.3257
						145.125	50.8563	30.7172	14.445
						146.42	50.4777	30.1218	10.8369
						147.716	51.6919	30.0415	17.4172
						149.012	50.3346	33.3432	12.9571
						150.308	53.3374	29.4261	15.1604
						151.603	55.0331	29.004	16.173
						152.899	51.2373	28.3685	16.8431
						154.195	52.4643	30.2024	10.872
						155.49	52.6229	29.9933	16.1314
						156.786	53.9504	36.8098	18.2231
						158.082	55.357	32.4746	19.7184
						159.378	51.2594	30.0215	19.6893
						160.673	54.25	30.9424	18.9961
						161.969	53.9404	35.7401	20.7005
						163.265	52.9694	34.9721	19.4964
						164.561	55.2976	30.5322	21.8188
						165.856	56.0314	34.2039	23.3317
						167.152	56.6467	32.4143	22.0662
						168.448	56.6134	34.1757	22.8014
						169.743	57.4678	34.6865	22.2047
						171.039	54.9913	32.189	22.5674
						172.335	56.1325	31.634	24.8658
						173.631	55.8266	35.3982	24.2889
						174.926	58.905	37.8875	19.8417
						176.222	56.8927	32.0683	25.0319
						177.518	58.6333	33.874	24.0886
						178.814	58.1076	33.2305	25.3458
						180.109	57.8881	34.2601	27.3493
						181.405	60.1888	33.6367	31.6821
						182.701	60.2101	37.0189	26.6611
						183.997	57.117	36.3231	28.2834
						185.292	59.1033	35.5469	29.128
						186.588	59.1298	35.0362	28.205
						187.884	60.7255	41.0444	26.5462
						189.179	59.9975	40.775	26.7673
						190.475	62.916	38.5713	31.1033
						191.771	60.5555	40.0552	34.2948
						193.067	61.9169	42.8863	31.4277
						194.362	60.2758	39.9908	28.2368
						195.658	62.4762	42.2348	29.4252
						196.954	62.7398	38.8527	30.7816
						198.25	64.1491	41.4907	30.6902
						199.545	64.9319	42.5403	28.7818
						200.841	62.818	43.5457	28.4274
						202.137	60.197	43.0833	27.3871
						203.432	61.2401	43.6542	28.876
						204.728	60.0556	40.6984	25.8811
						206.024	64.5538	46.1598	30.7673
						207.32	64.5524	44.8045	30.9242
						208.615	63.9347	43.7991	29.9776
						209.911	64.9664	42.3674	30.5074
						211.207	63.5023	40.1154	30.2721
						212.503	63.8333	41.2857	28.4795
						213.798	65.166	46.1599	33.8443
						215.094	64.4583	42.834	31.82
						216.39	65.3559	39.6892	31.2565
						217.685	65.9875	41.6758	31.9184
						218.981	65.8755	46.184	33.7317
						220.277	69.0669	41.7161	32.1412
						221.573	67.6961	47.5152	35.0387
						222.868	67.4314	48.9709	32.0342
						224.164	69.2165	48.3155	33.9929
						225.46	68.0624	44.3944	30.9159
						226.756	70.2269	45.1745	38.9252
						228.051	69.6684	47.8047	38.2126
						229.347	71.691	42.2912	39.6705
						230.643	70.9422	44.3543	39.5805
						231.939	71.0175	44.7484	39.1739
						233.234	69.1342	39.5163	37.4926
						234.53	70.8882	40.0914	37.4778
						235.826	72.8832	42.4882	41.4271
						237.121	71.2591	40.8837	42.3991
						238.417	70.5916	42.1705	43.3904
						239.713	69.1524	46.1478	42.0889
						241.009	70.2512	46.9682	41.5171
						242.304	71.3983	44.4186	44.0546
						243.6	73.0397	47.3141	46.3567
						244.896	75.3646	45.1948	43.3055
						246.192	71.455	45.6332	48.3956
						247.487	74.4842	51.2071	46.856
						248.783	73.5206	51.5288	46.1245
						250.079	74.276	46.0515	45.2518
						251.374	73.353	46.9925	46.9552
						252.67	73.9734	49.8679	47.0531
						253.966	73.9737	49.3693	44.9882
						255.262	74.7484	45.581	45.2462
						256.557	76.5773	49.0917	41.0034
						257.853	74.3235	44.1171	42.7895
						259.149	73.7516	44.9013	46.2159
						260.445	74.6082	50.9055	43.4356
