# Supplementary material for: Heparan sulfate-dependent phase separation of CCL5 and its chemotactic activity
Source: eLife journal article supplement (doi:10.7554/elife.93871), 2024-03-04
Supplement: fig1-data3 [file Figure 1-source data 3.xlsx]

## Sheet: Sheet1
							Figure 1-Source Data 3
							Figure 1F:Comparison of CCL5 and 44AANA47-CCL5 turbidity in the presence of heparin
							Source Data
							Replicate	CCL5	44AANA47-CCL5
							1	0.271	0.211
							2	0.2632	0.1998
							3	0.2752	0.218
							Descriptive statistics(arithmetic from GraphPad Prism8)
								CCL5	44AANA47-CCL5
							Number of values	3	3
							Minimum	0.2632	0.1998
							Maximum	0.2752	0.218
							Range	0.012	0.0182
							Mean	0.2698	0.2096
							Std. Deviation	0.006089	0.00918
							Std. Error of Mean	0.003516	0.0053
							P value(vs. CCL5)		<0.0001
							Shapiro-Wilk test results(arithmetic from GraphPad Prism8)
								CCL5	44AANA47-CCL5
							W	0.9709	0.9826
							P value	0.6725	0.747
