# Supplementary material for: Heparan sulfate-dependent phase separation of CCL5 and its chemotactic activity
Source: eLife journal article supplement (doi:10.7554/elife.93871), 2024-03-04
Supplement: fig2-data1 [file Figure 2-source data 1.xlsx]

## Sheet: Sheet1
Figure 2-Source Data 1
Figure 2B Quantification of the fluorescence signals along the lines with arrows
Source Data
	Signal intensity
Distance_(inches)	CCL5-EGFP+Heparin beads	CCL5-EGFP+Ni beads	44AANA47-CCL5-EGFP+Heparin beads
0	2.41667	0	0
0.00333333	1.2318	0	0
0.00666667	0.769836	0	0
0.01	0	0	0
0.0133333	1.10678	0	0
0.0166667	0	0	0
0.02	3.27117	0	0
0.0233333	11.2439	0	0
0.0266667	16.6769	0	0
0.03	10.809	0	0
0.0333333	2.36371	0	0
0.0366667	0.149985	0	0
0.04	0	0	0
0.0433333	0.307655	0	0
0.0466667	0.00648104	0	0
0.05	4.17031	0	0
0.0533333	9.09916	0	0
0.0566667	10.1453	0	0
0.06	0.00660246	0	0
0.0633333	0.0406014	0	0
0.0666667	2.74745	0	0
0.07	0	0	0
0.0733333	0.121212	0	0
0.0766667	1.8843	0	0
0.08	4.34928	0	0
0.0833333	0	0	0
0.0866667	0	0	0
0.09	0.742151	0	0
0.0933333	2.25409	0	0
0.0966667	8.85478	0	0
0.1	10.1308	0	0
0.103333	0.0153893	0	0
0.106667	0	0	0
0.11	0	0	0
0.113333	0.0342531	0	0
0.116667	2.47562	0	0
0.12	7.41606	0	0
0.123333	17.2619	0	0
0.126667	11.1701	0	0
0.13	9.99329	0	0
0.133333	4.25351	0	0
0.136667	3.35895	0	0
0.14	1.87326	0	0
0.143333	4.62429	0	0
0.146667	3.96771	0	0
0.15	1.47526	0	0
0.153333	0.0281604	0	0
0.156667	2.02877	0	0
0.16	7.20375	0	0
0.163333	9.31417	0	0
0.166667	1.89399	0	0
0.17	0	0	0
0.173333	0	0	0
0.176667	3.63759	0	0
0.18	0.866534	0	0
0.183333	0.888353	0	0
0.186667	4.32345	0	0
0.19	4.1992	0	0
0.193333	0.0488766	0	0
0.196667	2.66189	0	0
0.2	4.06404	0	0
0.203333	1.55868	0	0
0.206667	0.030329	0	0
0.21	6.23511	0	0
0.213333	14.529	0	0
0.216667	2.70035	0	0
0.22	0	0	0
0.223333	0	0	0
0.226667	4.09506	0	0
0.23	6.68075	0	0
0.233333	8.2233	0	0
0.236667	4.24407	0	0
0.24	5.58325	0	0
0.243333	6.06692	0	0
0.246667	0	0	0
0.25	0	0	0
0.253333	0	0	0
0.256667	0	0	0
0.26	0.0138367	0	0
0.263333	6.18	0	0
0.266667	7.69009	0	0
0.27	8.10647	0	0
0.273333	9.75548	0	0
0.276667	5.04362	0	0
0.28	1.23424	0	0
0.283333	0	0	0
0.286667	2.78673	0	0
0.29	11.6278	0	0
0.293333	6.67876	0	0
0.296667	0	0	0
0.3	0.38921	0	0
0.303333	13.1689	0	0
0.306667	6.97806	0	0
0.31	0	0	0
0.313333	0	0	0
0.316667	1.67438	0	0
0.32	8.82527	0	0
0.323333	5.39678	0	0
0.326667	3.25686	0	0
0.33	15.5675	0	0
0.333333	6.15097	0	0
0.336667	0	0	0
0.34	0	0	0
0.343333	1.23613	0	0
0.346667	2.22433	0	0
0.35	5.35588	0	0
0.353333	7.40389	0	0
0.356667	3.43715	0	0
0.36	0.120438	0	0
0.363333	0	0	0
0.366667	0	0	0
0.37	0	0	0
0.373333	0	0	0
0.376667	0	0	0
0.38	0	0	0
0.383333	0	0	0
0.386667	2.23724	0	0
0.39	0.559986	0	0
0.393333	0.154699	0	0
0.396667	4.4744	0	0
0.4	1.46817	0	0
0.403333	0	0	0
0.406667	0	0	0
0.41	0	0	0.719858
0.413333	0	0	0.744681
0.416667	0	0	0
0.42	0	0	0
0.423333	0	0	0
0.426667	7.54879	0	0
0.43	20.4668	0	0
0.433333	8.22598	0	0
0.436667	3.52421	0	0
0.44	1.30624	0	0
0.443333	7.62483	0	0
0.446667	11.8294	0	0
0.45	3.6137	0	0
0.453333	1.7861	0	0
0.456667	6.94176	0	0
0.46	7.31745	0	0
0.463333	5.71975	0	0
0.466667	0	0	0
0.47	3.20174	0	0
0.473333	9.35421	0	0
0.476667	1.03597	0	0
0.48	0.879858	0	0
0.483333	8.52577	0	0
0.486667	16.8935	0	0
0.49	1.20637	0	0
0.493333	0	0	0
0.496667	2.46312	0	0
0.5	8.80038	0	0
0.503333	4.89579	0	0
0.506667	0.0230315	0	0
0.51	2.53488	0	0
0.513333	5.39639	0	0
0.516667	9.103	0	0
0.52	10.5863	0	0
0.523333	4.42339	0	0
0.526667	0	0	0
0.53	0	0	0
0.533333	6.98287	0	0
0.536667	19.6369	0	0
0.54	8.66502	0	0
0.543333	0.563992	0	0
0.546667	13.4078	0	0
0.55	16.9635	0	0
0.553333	10.4118	0	0
0.556667	8.86915	0	0
0.56	8.22494	0	0
0.563333	13.28	0	0
0.566667	32.4699	0	0
0.57	13.866	0	0
0.573333	1.55852	0	0
0.576667	0	0	0
0.58	0.0937	0	0
0.583333	4.85892	0	0
0.586667	12.1543	0	0
0.59	10.3976	0	0
0.593333	8.03796	0	0
0.596667	8.42394	0	0
0.6	8.89922	0	0
0.603333	9.1959	0	0
0.606667	9.31231	0	0
0.61	3.73404	0	0
0.613333	0.849169	0	0
0.616667	4.79492	0	0
0.62	10.55	0	0
0.623333	5.60292	0	0
0.626667	0.400837	0	0
0.63	5.16274	0	0
0.633333	18.7345	0	0
0.636667	5.2691	0	0
0.64	3.7046	0	0
0.643333	8.63613	0	0
0.646667	21.3212	0	0
0.65	9.25987	0	0
0.653333	5.79751	0	0
0.656667	8.93945	0	0
0.66	19.4545	0	0
0.663333	16.3874	0	0
0.666667	13.552	0	0
0.67	10.2975	0	0
0.673333	4.32309	0	0
0.676667	9.6229	0	0
0.68	12.5626	0	0
0.683333	8.34435	0	0
0.686667	2.49069	0	0
0.69	0	0	0
0.693333	0.414153	0	0
0.696667	5.26515	0	0
0.7	0	0	0
0.703333	0.0614175	0	0
0.706667	15.1437	0	0
0.71	16.411	0	0
0.713333	0.635865	0	0
0.716667	17.8777	0	0
0.72	22.8514	0	0
0.723333	20.2346	0	0
0.726667	17.4427	0	0
0.73	10.2184	0	0
0.733333	3.50582	0	0
0.736667	1.60433	0	0
0.74	7.52298	0	0
0.743333	13.809	0	0
0.746667	16.2911	0	0
0.75	11.5718	0	0
0.753333	10.6959	0	0
0.756667	17.0498	0	0
0.76	12.6532	0	0
0.763333	17.2376	0	0
0.766667	16.0274	0	0
0.77	10.9532	0	0
0.773333	21.7971	0	0
0.776667	22.2911	0	0
0.78	19.1022	0	0
0.783333	12.4588	0	0
0.786667	4.34953	0	0
0.79	2.07726	0	0
0.793333	1.18444	0	0
0.796667	8.11786	0	0
0.8	8.80495	0	0
0.803333	3.75786	0	0
0.806667	8.87963	0	0
0.81	16.1873	0	0
0.813333	19.7829	0	0
0.816667	14.9077	0	0
0.82	18.2862	0	0
0.823333	16.7873	0	0
0.826667	9.04751	0	0
0.83	6.55969	0	0
0.833333	3.34462	0	0
0.836667	4.54672	0	0
0.84	3.41296	0	0
0.843333	13.0901	0	0
0.846667	16.1469	0	0
0.85	3.47363	0	0
0.853333	19.9445	0	0
0.856667	27.6133	0	0
0.86	12.8924	0	0
0.863333	5.65939	0	0
0.866667	9.43375	0	0
0.87	14.4305	0	0
0.873333	26.5507	0	0
0.876667	18.7346	0	0
0.88	9.52135	0	0
0.883333	3.22727	0	0
0.886667	0.491802	0	0
0.89	5.57484	0	0
0.893333	7.88212	0	0
0.896667	13.5449	0	0
0.9	8.97399	0	0
0.903333	9.33809	0	0
0.906667	12.729	0	0
0.91	7.58308	0	0
0.913333	1.20111	0	0
0.916667	16.3333	0	0
0.92	22.8471	0	0
0.923333	10.4585	0	0
0.926667	1.25513	0	0
0.93	16.0096	0	0
0.933333	16.0433	0	0
0.936667	16.7101	0	0
0.94	23.2927	0	0
0.943333	14.3025	0	0
0.946667	26.0151	0	0
0.95	41.0974	0	0
0.953333	20.7241	0	0
0.956667	14.0263	0	0
0.96	7.23201	0	0
0.963333	5.39656	0	0
0.966667	23.9803	0	0
0.97	23.2142	0	0
0.973333	8.26133	0	0
0.976667	11.688	0	0
0.98	8.241	0	0
0.983333	1.27594	0	0
0.986667	3.45778	0	0
0.99	16.697	0	0
0.993333	27.629	0	0
0.996667	31.5465	0	0
1	23.3352	0	0
1.00333	19.9108	0	0
1.00667	20.4298	0	0
1.01	4.78581	0	0
1.01333	8.904	0	0
1.01667	19.5988	0	0
1.02	25.0793	0	0
1.02333	10.6852	0	0
1.02667	5.32208	0	0
1.03	19.1128	0	0
1.03333	12.0008	0	0
1.03667	6.74197	0	0
1.04	2.44056	0	0
1.04333	6.65417	0	0
1.04667	21.0452	0	0
1.05	21.4748	0	0
1.05333	10.3748	0	0
1.05667	8.31159	0	0
1.06	5.01281	0	0
1.06333	4.39027	0	0
1.06667	3.5594	0	0
1.07	11.8401	0	0
1.07333	20.5129	0	0
1.07667	18.9129	0	0
1.08	13.2733	0	0
1.08333	9.0295	0	0
1.08667	10.0152	0	0
1.09	22.0431	0	0
1.09333	20.3952	0	0
1.09667	13.7764	0	0
1.1	15.8983	0	0
1.10333	25.0283	0	0
1.10667	18.148	0	0
1.11	7.79903	0	0
1.11333	11.6691	0	0
1.11667	19.2283	0	0
1.12	19.3163	0	0
1.12333	14.3198	0	0
1.12667	15.2561	0	0
1.13	21.2844	0	0
1.13333	21.4109	0	0
1.13667	21.3118	0	0
1.14	25.0814	0	0
1.14333	28.2102	0	0
1.14667	26.6916	0	0
1.15	24.2753	0	0
1.15333	17.4975	0	0
1.15667	1.60203	0	0
1.16	5.01469	0	0
1.16333	8.9197	0	0
1.16667	9.58169	0	0
1.17	6.11606	0	0
1.17333	10.8659	0	0
1.17667	13.4063	0	0
1.18	7.67433	0	0
1.18333	10.5003	0	0
1.18667	13.005	0	0
1.19	9.51941	0	0
1.19333	10.6138	0	0
1.19667	22.986	0	0
1.2	21.2252	0	0
1.20333	18.1209	0	0
1.20667	20.5286	0	0
1.21	23.9167	0	0
1.21333	34.871	0	0
1.21667	28.1403	0	0
1.22	17.8165	0	0
1.22333	15.77	0	0
1.22667	16.6026	0	0
1.23	14.4036	0	0
1.23333	9.54467	0	0
1.23667	18.3806	0	0
1.24	25.6405	0	0
1.24333	25.0624	0	0
1.24667	4.51645	0	0
1.25	11.9052	0	0
1.25333	16.2401	0	0
1.25667	10.2459	0	0
1.26	15.0023	0	0
1.26333	24.0488	0	0
1.26667	22.6454	0	0
1.27	22.3587	0	0
1.27333	17.9863	0	0
1.27667	18.0741	0	0
1.28	18.6543	0	0
1.28333	25.2027	0	0
1.28667	21.8364	0	0
1.29	14.2231	0	0
1.29333	3.14555	0	0
1.29667	12.7688	0	0
1.3	19.9715	0	0
1.30333	15.275	0	0
1.30667	18.9289	0	0
1.31	22.9395	0	0
1.31333	17.7761	0	0
1.31667	22.9253	0	0
1.32	20.1866	0	0
1.32333	16.2548	0	0
1.32667	16.3468	0	0
1.33	12.9549	0	0
1.33333	12.4786	0	0
1.33667	24.5669	0	0
1.34	31.3578	0	0
1.34333	29.101	0	0
1.34667	26.7249	0	0
1.35	23.8666	0	0
1.35333	14.5292	0	0
1.35667	11.2095	0	0
1.36	16.8695	0	0
1.36333	18.1884	0	0
1.36667	17.6355	0	0
1.37	15.4613	0	0
1.37333	14.9305	0	0
1.37667	22.0808	0	0
1.38	31.5064	0	0
1.38333	15.5304	0	0
1.38667	15.3099	0	0
1.39	17.3688	0	0
1.39333	26.5249	0	0
1.39667	20.3001	0	0
1.4	14.7195	0	0
1.40333	14.8815	0	0
1.40667	23.2927	0	0
1.41	20.4977	0	0
1.41333	17.996	0	0
1.41667	26.8782	0	0
1.42	26.736	0	0
1.42333	18.6956	0	0
1.42667	14.9743	0	0
1.43	23.3189	0	0
1.43333	30.6474	0	0
1.43667	28.2649	0	0
1.44	20.7137	0	4.78723
1.44333	24.9416	0	10.7996
1.44667	22.0312	0	18.7624
1.45	14.0352	0	22.3599
1.45333	17.3263	0	24.0496
1.45667	23.1445	0	30.8652
1.46	28.3566	0	35.6383
1.46333	30.0302	0	37.727
1.46667	29.9091	0	35.7872
1.47	28.9656	0	35.5523
1.47333	27.4363	0	34.383
1.47667	14.8491	0	27.5
1.48	8.96899	0	15.9025
1.48333	12.4041	0	4.55585
1.48667	21.4244	0	0
1.49	21.5573	0	0
1.49333	15.8753	0	0
1.49667	8.68139	0	0
1.5	8.4413	0	0
1.50333	11.1101	0	0
1.50667	15.8387	0	0
1.51	21.4469	0	0
1.51333	26.8143	0	0.762411
1.51667	32.4218	0	0.766844
1.52	53.0418	0	0
1.52333	55.59	0	0
1.52667	51.1256	0	0
1.53	41.1072	0	0
1.53333	40.4139	0	0
1.53667	44.1748	0	0
1.54	46.6644	0	0
1.54333	48.6853	0	0
1.54667	50.1133	0	0
1.55	50.2965	0	0
1.55333	49.756	0	0
1.55667	48.6076	0	0
1.56	45.6827	0	0
1.56333	53.8601	0	0
1.56667	57.2519	0	0
1.57	61.4395	0	0
1.57333	63.0342	0	0
1.57667	55.671	0	0
1.58	53.8525	0	0
1.58333	56.7011	0	0
1.58667	57.173	0	0
1.59	59.9924	0	0
1.59333	59.2934	0	0
1.59667	57.5669	0	0
1.6	58.8871	0	0
1.60333	60.2252	0	0
1.60667	62.4887	0	0
1.61	63.7146	0	0
1.61333	62.3056	0	0
1.61667	61.9885	0	0
1.62	65.8741	0	0
1.62333	63.6717	0	0
1.62667	62.2221	0	0
1.63	62.7998	0	0
1.63333	66.0265	0	0
1.63667	67.7163	0	0
1.64	66.5452	0	0
1.64333	67.9237	0	0
1.64667	67.3285	0	0
1.65	66.8705	0	0
1.65333	67.2685	0	0
1.65667	66.9554	0	0
1.66	66.496	0	0
1.66333	66.1605	0	0
1.66667	68.133	0	0
1.67	67.3306	0	0
1.67333	67.9398	0	0
1.67667	68.8538	0	0
1.68	66.1391	0	0
1.68333	65.3491	0	0
1.68667	65.5305	0	0
1.69	67.1855	11.3333	0
1.69333	69.9322	22.852	0
1.69667	70.2046	37.2339	0
1.7	66.1567	51.8341	0
1.70333	69.2697	49.2205	0
1.70667	70.5392	56.8296	0
1.71	66.7798	51.6667	0
1.71333	65.8254	52.0673	0
1.71667	65.552	57.2265	0
1.72	69.219	55.4036	0
1.72333	73.4668	57.2422	0
1.72667	72.7222	56.8401	0
1.73	70.4588	59.8333	0
1.73333	70.1608	53.3199	0
1.73667	67.7081	56.6315	0
1.74	68.3201	59.4544	0
1.74333	73.386	56.1398	0
1.74667	72.3845	57.9357	0
1.75	71.2832	61.0456	0
1.75333	70.4198	61.9746	0
1.75667	72.4928	61.5486	0
1.76	71.6488	61.5306	0
1.76333	71.3361	59.3857	0
1.76667	72.0624	56.7967	0
1.77	71.8876	58.1719	0
1.77333	71.1296	64.9208	0
1.77667	68.0639	64.1883	0
1.78	70.2104	63.009	0
1.78333	70.2195	61.2534	0
1.78667	71.4301	63.4245	0
1.79	72.1298	62.8004	0
1.79333	72.9802	70.9447	0
1.79667	73.0464	65.2489	0
1.8	71.4186	63.6921	0
1.80333	72.8551	62.9439	0
1.80667	71.5802	63.6427	0
1.81	71.2125	64.3961	0
1.81333	72.2074	63.3363	0
1.81667	73.727	63.4566	0
1.82	72.9703	59.0852	0
1.82333	70.7606	63.4985	0
1.82667	73.5859	58.9013	0
1.83	74.2592	58.6667	0
1.83333	74.1808	64.9163	0
1.83667	68.4702	64.0904	0
1.84	71.3902	66.8326	0
1.84333	73.4019	65.7676	0
1.84667	72.4963	59.5815	0
1.85	71.0092	63.8931	0
1.85333	70.6329	68.5112	0
1.85667	70.3333	67.8221	0
1.86	71.0138	67.139	0
1.86333	70.9605	65.7212	0
1.86667	70.131	62.9761	0
1.87	71.0909	61.1868	0
1.87333	71.8398	64.2451	0
1.87667	70.5709	66.4626	0
1.88	72.3796	65.8774	0
1.88333	72.9754	65.7616	0
1.88667	70.9686	65.8386	0
1.89	67.9282	64.0628	0
1.89333	72.112	65.4888	0
1.89667	71.0926	61.2795	0
1.9	70.4719	61.6293	0
1.90333	67.038	59.6196	0
1.90667	69.8941	61.2496	0
1.91	68.9835	61.9148	0
1.91333	64.3458	61.4709	0
1.91667	65.1818	61.3797	0
1.92	66.8055	65.4155	0
1.92333	69.7677	64.8827	0
1.92667	69	66.2227	0
1.93	69.0484	66.6667	0
1.93333	69.7954	65.9357	0
1.93667	71.3729	66.4993	0
1.94	70.0574	69.3812	0
1.94333	67.4611	67.4581	0
1.94667	64.6585	64.6667	0
1.95	63.3072	68.4395	0
1.95333	64.6782	67.7549	0
1.95667	65.8782	71.8924	0
1.96	67.5666	69.4006	0
1.96333	67.1519	69.4297	0
1.96667	65.4399	64.6637	0
1.97	62.8635	63.1099	0
1.97333	64.559	64.8191	0
1.97667	61.8335	58.0202	0
1.98	59.6591	62.3109	0
1.98333	66.311	63.6106	0
1.98667	63.1208	64.2616	0
1.99	61.6143	64.5927	0
1.99333	62.0489	64.6353	0
1.99667	58.2473	64.8857	0
2	59.3579	59.3528	0
2.00333	59.836	65.8692	0
2.00667	57.5776	65.8251	0
2.01	58.2851	58.9103	0
2.01333	59.8495	63.4514	0
2.01667	59.1389	63.7444	0
2.02	61.4986	62.574	0
2.02333	59.84	61.5291	0
2.02667	57.1677	59.7414	0
2.03	56.914	61.9656	0
2.03333	54.4137	60.8999	0
2.03667	53.9425	57.713	0
2.04	49.0956	58.6323	0
2.04333	53.6014	57.7197	0
2.04667	55.9968	64.7788	0
2.05	52.414	57.583	0
2.05333	49.2356	62.6099	0
2.05667	45.6905	62.3483	0
2.06	40.5754	60.1734	0
2.06333	47.3697	60.2922	0
2.06667	48.9926	64.4604	0
2.07	53.0788	58.2332	0
2.07333	53.9955	57.2975	0
2.07667	49.259	60.4058	0
2.08	46.6467	62.9043	0
2.08333	47.1295	62.0927	0
2.08667	47.9778	62.4245	0
2.09	43.4148	59.1196	0
2.09333	35.467	57.0329	0
2.09667	32.8505	59.6413	0
2.1	25.2582	53.8401	0
2.10333	21.0793	54.3333	0
2.10667	25.6689	54.2601	0
2.11	26.6548	53.5336	0
2.11333	29.2794	53	0
2.11667	31.6856	53.4245	0
2.12	22.5135	52.713	0
2.12333	25.7667	52.3333	0
2.12667	30.9008	51.6667	0
2.13	25.9325	52.0852	0
2.13333	23.3585	50.6861	0
2.13667	25.544	50.9746	0
2.14	26.2499	52.9522	0
2.14333	25.7666	49.6682	0
2.14667	27.1999	49.6667	0
2.15	33.1492	50.3049	0
2.15333	30.4333	54.5411	0
2.15667	16.4453	48.361	0
2.16	20.118	46.275	0
2.16333	22.5073	34.8767	0
2.16667	14.3883	24.4753	0
2.17	10.9751	10.9395	0
2.17333	12.1924	1.08819	0
2.17667	14.4201	0	0
2.18	15.7988	0	0
2.18333	22.7917	0	0
2.18667	14.6785	0	0
2.19	7.71901	0	0
2.19333	8.63395	0	0
2.19667	26.5682	0	0
2.2	21.3928	0	0
2.20333	23.8394	0	0
2.20667	26.1389	0	0
2.21	20.949	0	0
2.21333	18.0807	0	0
2.21667	16.7582	0	0
2.22	21.9256	0	0
2.22333	23.7739	0	0
2.22667	18.6897	0	0
2.23	11.5113	0	0
2.23333	11.4673	0	0
2.23667	17.0431	0	0
2.24	22.6713	0	0
2.24333	24.4948	0	0
2.24667	25.2068	0	0
2.25	19.1629	0	0
2.25333	12.3124	0	0
2.25667	5.43806	0	0
2.26	15.8126	0	0
2.26333	23.1399	0	0
2.26667	15.9665	0	0
2.27	11.034	0	0
2.27333	6.83226	0	0
2.27667	2.06147	0	0
2.28	22.8588	0	0
2.28333	24.8333	0	0
2.28667	22.286	0	0
2.29	27.7812	0	0
2.29333	14.734	0	0
2.29667	6.04212	0	0
2.3	12.0754	0	0
2.30333	24.1289	0	0
2.30667	16.2055	0	0
2.31	12.7824	0	0
2.31333	23.5754	0	0
2.31667	20.0254	0	0
2.32	17.337	0	0
2.32333	21.4801	0	2.37766
2.32667	15.1166	0	2.3617
2.33	15.9106	0	0
2.33333	22.6617	0	0
2.33667	27.1549	0	0
2.34	15.2612	0	0
2.34333	6.90471	0	0
2.34667	17.7449	0	0
2.35	15.8418	0	0
2.35333	18.3898	0	0
2.35667	21.8025	0	0
2.36	14.4919	0	0
2.36333	12.1869	0	0
2.36667	13.6232	0	0
2.37	13.8893	0	0
2.37333	16.8671	0	0
2.37667	24.2273	0	0
2.38	16.4931	0	0
2.38333	16.0867	0	0
2.38667	17.509	0	0
2.39	21.0802	0	0
2.39333	30.2015	0	0
2.39667	20.3155	0	0
2.4	11.2083	0	0
2.40333	8.4569	0	0.886525
2.40667	4.05709	0	2.04255
2.41	11.6311	0	2.60904
2.41333	21.7002	0	6.76064
2.41667	20.1932	0	14.5559
2.42	16.25	0	25.0532
2.42333	14.8412	0	29.7509
2.42667	15.8809	0	30.1011
2.43	18.8576	0	36.2154
2.43333	15.601	0	40.922
2.43667	15.0934	0	38.3449
2.44	16.424	0	31.4699
2.44333	12.2904	0	21.5328
2.44667	1.82645	0	7.53191
2.45	1.79317	0	0
2.45333	9.56176	0	0
2.45667	17.076	0	0
2.46	17.6742	0	0
2.46333	15.5995	0	0
2.46667	11.07	0	0
2.47	2.36509	0	0
2.47333	1.53407	0	0
2.47667	2.23366	0	0
2.48	8.04497	0	0
2.48333	9.15277	0	0
2.48667	23.4032	0	0
2.49	29.5879	0	0
2.49333	9.74862	0	0
2.49667	24.8725	0	0
2.5	23.4981	0	0
2.50333	6.93259	0	0
2.50667	3.9822	0	0
2.51	5.18687	0	0
2.51333	13.9116	0	0
2.51667	24.1635	0	0
2.52	27.7021	0	0
2.52333	23.0801	0	0
2.52667	20.2484	0	0
2.53	22.0891	0	0
2.53333	16.6446	0	0
2.53667	5.8113	0	0
2.54	19.4985	0	0
2.54333	28.2907	0	0
2.54667	25.4066	0	0
2.55	22.0548	0	0
2.55333	18.3345	0	0
2.55667	16.9051	0	0
2.56	15.7564	0	0
2.56333	16.4739	0	0
2.56667	19.8168	0	0
2.57	27.9751	0	0
2.57333	16.7123	0	0
2.57667	13.489	0	0
2.58	12.084	0	0
2.58333	1.83965	0	0
2.58667	7.3241	0	0
2.59	12.8698	0	0
2.59333	20.1471	0	0
2.59667	12.6586	0	0
2.6	10.7316	0	0
2.60333	11.0448	0	0
2.60667	16.0288	0	0
2.61	27.9497	0	0
2.61333	19.9555	0	0
2.61667	9.74537	0	0
2.62	17.5011	0	0
2.62333	14.0202	0	0
2.62667	5.62749	0	0
2.63	5.51011	0	0
2.63333	9.75725	0	0
2.63667	18.8326	0	0
2.64	5.55854	0	0
2.64333	6.05402	0	0.140957
2.64667	13.3257	0	0.138298
2.65	16.7453	0	0
2.65333	21.5346	0	0
2.65667	24.2767	0	0
2.66	28.4777	0	0
2.66333	26.7608	0	0
2.66667	20.0035	0	0
2.67	18.1313	0	0
2.67333	21.6614	0	0
2.67667	15.6566	0	0
2.68	17.2712	0	0
2.68333	19.4799	0	0
2.68667	18.1747	0	0
2.69	11.2437	0	0
2.69333	16.5913	0	0
2.69667	24.1494	0	0
2.7	10.3502	0	0
2.70333	3.27644	0	0
2.70667	12.6323	0	0
2.71	25.2218	0	0
2.71333	23.0308	0	0
2.71667	15.112	0	0
2.72	16.185	0	0
2.72333	18.1216	0	0
2.72667	10.7326	0	0
2.73	0.0952291	0	0
2.73333	6.60375	0	0
2.73667	16.5987	0	0
2.74	18.4635	0	0
2.74333	18.5755	0	0
2.74667	15.8697	0	0
2.75	7.35996	0	0
2.75333	5.98509	0	0
2.75667	5.75521	0	0
2.76	10.9508	0	0
2.76333	10.9641	0	0
2.76667	18.3464	0	0
2.77	23.376	0	0
2.77333	19.083	0	0
2.77667	12.1054	0	0
2.78	6.00005	0	0
2.78333	3.73236	0	0
2.78667	1.73561	0	0
2.79	7.92183	0	0
2.79333	11.0634	0	0
2.79667	7.08892	0	0
2.8	0.34101	0	0
2.80333	10.0221	0	0
2.80667	23.2786	0	0
2.81	20.9663	0	0
2.81333	17.1135	0	0
2.81667	12.6643	0	0
2.82	15.7315	0	0
2.82333	9.36111	0	0
2.82667	2.2226	0	0
2.83	4.12075	0	0
2.83333	10.4342	0	0
2.83667	17.9481	0	0
2.84	16.5539	0	0
2.84333	18.0468	0	0
2.84667	20.9807	0	0
2.85	16.4159	0	0
2.85333	3.0049	0	0
2.85667	4.01509	0	0
2.86	5.86455	0	0
2.86333	0.70961	0	0
2.86667	1.93649	0	0
2.87	4.78842	0	0
2.87333	11.6809	0	0
2.87667	21.9925	0	0
2.88	4.85139	0	0
2.88333	3.71473	0	0
2.88667	14.9845	0	0
2.89	19.5243	0	0
2.89333	6.30141	0	0
2.89667	5.68235	0	0
2.9	17.069	0	0
2.90333	22.7515	0	0
2.90667	10.171	0	0
2.91	9.24828	0	0
2.91333	15.1807	0	0
2.91667	21.7679	0	0
2.92	23.0059	0	0
2.92333	21.5425	0	0
2.92667	11.3044	0	0
2.93	1.85125	0	0
2.93333	6.11134	0	0
2.93667	18.9765	0	0
2.94	16.9012	0	0
2.94333	7.5059	0	0
2.94667	3.87934	0	0
2.95	15.3956	0	0
2.95333	26.5575	0	0
2.95667	9.92575	0	0
2.96	12.9412	0	0
2.96333	16.2021	0	0
2.96667	19.7707	0	0
2.97	25.9773	0	0
2.97333	19.1766	0	0
2.97667	16.3955	0	0
2.98	24.3927	0	0
2.98333	13.9285	0	0
2.98667	5.37151	0	0
2.99	2.35767	0	0
2.99333	1.24742	0	0
2.99667	3.04699	0	0
3	8.00603	0	0
3.00333	4.64286	0	0
3.00667	3.04278	0	0
3.01	1.77122	0	0
3.01333	5.23676	0	0
3.01667	2.87407	0	0
3.02	3.48878	0	0
3.02333	0.934234	0	0
3.02667	0.965822	0	0
3.03	6.22357	0	0
3.03333	14.0023	0	0
3.03667	2.72892	0	0
3.04	0.406727	0	0
3.04333	0.438705	0	0
3.04667	6.90345	0	0
3.05	7.12173	0	0
3.05333	3.5395	0	0
3.05667	1.62141	0	0
3.06	0.313503	0	0
3.06333	0.694919	0	0
3.06667	1.54542	0	0
3.07	3.15365	0	0
3.07333	12.1763	0	0
3.07667	11.2326	0	0
3.08	16.6015	0	0
3.08333	12.3588	0	0
3.08667	16.2501	0	0
3.09	15.4885	0	0
3.09333	0.959863	0	0
3.09667	1.02319	0	0
3.1	3.25895	0	0
3.10333	8.66667	0	0
3.10667	5.96917	0	0
3.11	5.98979	0	0
3.11333	7.70559	0	0
3.11667	10.0823	0	0
3.12	11.6143	0	0
3.12333	9.78231	0	0
3.12667	8.25084	0	0
3.13	1.07154	0	0
3.13333	2.63361	0	0
3.13667	7.56095	0	0
3.14	17.5648	0	0
3.14333	19.7294	0	0
3.14667	15.2484	0	0
3.15	9.54555	0	0
3.15333	9.10759	0	0
3.15667	4.28502	0	0
3.16	0	0	0
3.16333	0	0	0
3.16667	6.60702	0	0
3.17	17.0449	0	0
3.17333	22.2043	0	0
3.17667	10.6077	0	0
3.18	1.94307	0	0
3.18333	0.872589	0	0
3.18667	9.07839	0	0
3.19	18	0	0
3.19333	18.3665	0	0
3.19667	18.7283	0	0
3.2	10.8748	0	0
3.20333	2.5033	0	0
3.20667	4.56976	0	0
3.21	0.202001	0	0
3.21333	2.95178	0	0
3.21667	5.17781	0	0
3.22	9.75579	0	0
3.22333	16.1338	0	0
3.22667	19.463	0	0
3.23	11.1174	0	0
3.23333	13.0573	0	0
3.23667	11.3195	0	0
3.24	10.8481	0	0
3.24333	4.93712	0	0
3.24667	2.53774	0	0
3.25	1.30121	0	0
3.25333	3.81832	0	0
3.25667	0.770464	0	0
3.26	0	0	0
3.26333	0	0	0
3.26667	4.4943	0	0
3.27	11.1638	0	0
3.27333	7.36483	0	0
3.27667	17.4947	0	0
3.28	11.4174	0	0
3.28333	2.57442	0	0
3.28667	4.59055	0	0
3.29	12.9633	0	0
3.29333	13.3544	0	0
3.29667	9.44077	0	0
3.3	0.650826	0	0
3.30333	5.59977	0	0
3.30667	5.44775	0	0
3.31	1.35184	0	0
3.31333	0	0	0
3.31667	3.81311	0	0
3.32	12.4412	0	0
3.32333	6.0234	0	0
3.32667	1.06697	0	0
3.33	0.028328	0	0
3.33333	8.98129	0	0
3.33667	4.61876	0	0
3.34	0	0	0
3.34333	0	0	0
3.34667	2.42389	0	0
3.35	10.5909	0	0
3.35333	11.6079	0	0
3.35667	9.84519	0	0
3.36	2.2784	0	0
3.36333	0	0	0
3.36667	0	0	0
3.37	0	0	0
3.37333	0	0	0
3.37667	1.56398	0	0
3.38	0.288499	0	0
3.38333	1.59023	0	0
3.38667	4.46756	0	0
3.39	5.6917	0	0
3.39333	9.78935	0	0
3.39667	17.8831	0	0
3.4	27.6735	0	0
3.40333	22.7342	0	0
3.40667	11.7823	0	0
3.41	10.4931	0	0
3.41333	4.9409	0	0
3.41667	8.9971	0	0
3.42	16.9837	0	0
3.42333	0.167976	0	0
3.42667	2.10579	0	0
3.43	10.7571	0	0
3.43333	7.20599	0	0
3.43667	10.5459	0	0
3.44	5.45455	0	0
3.44333	0	0	0
3.44667	0.277319	0	0
3.45	0.0263643	0	0
3.45333	1.74422	0	0
3.45667	3.90496	0	0
3.46	11.1712	0	0
3.46333	8.53878	0	0
3.46667	2.87055	0	0
3.47	0.828706	0	0
3.47333	0	0	0
3.47667	0.603467	0	0
3.48	9.84574	0	0
3.48333	12.7428	0	0
3.48667	6.49659	0	0
3.49	0.0718094	0	0
3.49333	3.35895	0	0
3.49667	3.60987	0	0
3.5	0	0	0
3.50333	0	0	0
3.50667	0	0	0
3.51	0	0	0
3.51333	2.3	0	0
3.51667	10.9146	0	0
3.52	8.0303	0	0
3.52333	2.33337	0	0
3.52667	1.69583	0	0
3.53	4.08873	0	0
3.53333	4.82849	0	0
3.53667	15.2151	0	0
3.54	10.2175	0	0
3.54333	0.0356976	0	0
3.54667	0	0	0
3.55	0	0	0
3.55333	2.71023	0	0
3.55667	10.4888	0	0
3.56	2.17545	0	0
3.56333	0	0	0
3.56667	0	0	0
3.57	0	0	0
3.57333	0	0	0
3.57667	3.47429	0	0
3.58	7.49874	0	0
3.58333	10.8555	0	0
3.58667	2.08562	0	0
3.59	0	0	0
3.59333	0	0	0
3.59667	0	0	0
3.6	0	0	0
3.60333	0.734894	0	0
3.60667	7.90809	0	0
3.61	7.15638	0	0
3.61333	0	0	0
3.61667	1.1384	0	0
3.62	3.43933	0	0
3.62333	9.43437	0	0
3.62667	13.7692	0	0
3.63	3.83333	0	0
