# Supplementary material for: Heparan sulfate-dependent phase separation of CCL5 and its chemotactic activity
Source: eLife journal article supplement (doi:10.7554/elife.93871), 2024-03-04
Supplement: fig2-data2 [file Figure 2-source data 2.xlsx]

## Sheet: Sheet1
					Figure 2-Source Data 1
					Figure 2D Cell counting of in vitro chemotaxis assay
					Source Data
						CCL5		44AANA47-CCL5
					Replicate	Heparin beads	Ni beads	Heparin beads	Ni beads
					1	1975	123	987	0
					2	1728	296	596	247
					3	2074	592	889	0
					Descriptive statistics(arithmetic from GraphPad Prism8)
						CCL5		44AANA47-CCL5
						Heparin beads	Ni beads	Heparin beads	Ni beads
					Number of values	3	3	3	3
					Minimum	1728	123	596	0
					Maximum	2074	592	987	247
					Range	346	469	391	247
					Mean	1926	337	824	82.33
					Std. Deviation	178.2	237.2	203.4	142.6
					Std. Error of Mean	102.9	136.9	117.5	82.33
					P value	0.000751		0.00649
					P value vs.CCL5+Heparin beads			0.0231
					Shapiro-Wilk test results(arithmetic from GraphPad Prism8)
						CCL5		44AANA47-CCL5
						Heparin beads	Ni beads	Heparin beads
					W	0.9425	0.9776	0.9234
					P value	0.5376	0.713	0.4606
