# Supplementary material for: Heparan sulfate-dependent phase separation of CCL5 and its chemotactic activity
Source: eLife journal article supplement (doi:10.7554/elife.93871), 2024-03-04
Supplement: fig3-data1 [file Figure 3-source data 1.xlsx]

## Sheet: Sheet1
Figure 3-Source Data 1
Figure 3C FRAP of the condensates formed by CCL5-Cy3
Source Data
Replicate	1	2	3
Time(s)	Fluorescence recovery
0	100	100	100
1.4	0	0	0
5.29	6.91	8.76	1.79
6.58	14.46	5.09	7.67
7.88	10.1	15.28	10.83
9.17	11.49	14.69	9
10.47	11.45	17.86	9.54
11.77	6.37	9.77	10.87
13.06	0.98	11.35	5.75
14.36	-0.94	11.52	16.12
15.65	9.32	20.37	16.16
16.95	17.28	23.96	15.5
18.24	19.81	31.72	12.37
19.54	13.37	32.3	18.37
20.84	24.9	32.05	15.87
22.13	25.86	26.71	21.54
23.43	12.34	35.73	18.08
24.72	18.24	28.3	20.49
26.02	20.68	35.48	23.12
27.31	26.07	29.55	28.32
28.61	19.94	30.13	27.24
29.91	31.21	32.05	23.41
31.2	40.66	28.63	22.99
32.5	32.06	37.56	23.53
33.79	34.69	36.23	22.53
35.09	34.81	34.14	32.86
36.38	26.22	43.41	29.78
37.68	30.87	35.81	39.69
38.98	40.46	36.73	31.36
40.27	29.26	38.31	33.66
41.57	36.46	41.99	34.45
42.86	31.23	32.47	36.57
44.16	39.64	30.97	37.61
45.45	39.01	28.46	39.44
46.75	38.56	38.81	36.65
48.05	38.52	38.81	45.32
49.34	30.45*	31.22	44.11
50.64	50.45	31.14	47.82
51.93	51.73	30.22	47.02
