# Supplementary material for: Heparan sulfate-dependent phase separation of CCL5 and its chemotactic activity
Source: eLife journal article supplement (doi:10.7554/elife.93871), 2024-03-04
Supplement: fig3-data2 [file Figure 3-source data 2.xlsx]

## Sheet: Sheet1
					Figure 3-Source Data 2
					Figure 3E Quantification of THP-1collected from the lower chamber
					Source Data
					Replicate	CCL5	CHO-K1	CCL5+CHO-K1	CCL5+CHO-677	CCL5+CHO-K1+HS	44AANA47-CCL5+CHO-K1
					1	247	547	8518	2740	2716	740
					2	123	247	6222	2183	864	494
					3	370	494	7284	3296	2839	617
					Descriptive statistics(arithmetic from GraphPad Prism8)
						CCL5	CHO-K1	CCL5+CHO-K1	CCL5+CHO-677	CCL5+CHO-K1+HS	44AANA47-CCL5+CHO-K1
					Number of values	3	3	3	3	3	3
					Minimum	123	247	6222	494	2183	864
					Maximum	370	547	8518	740	3296	2839
					Range	247	300	2296	246	1113	1975
					Mean	246.7	429.3	7341	617	2740	2140
					Std. Deviation	123.5	160.1	1149	123	556.5	1106
					Std. Error of Mean	71.3	92.44	663.4	71.01	321.3	638.8
					P value(vs. CCL5+CHO-K1)	0.0004	0.0005		0.0034	0.0028	0.0005
					Shapiro-Wilk test results(arithmetic from GraphPad Prism8)
						CCL5	CHO-K1	CCL5+CHO-K1	CCL5+CHO-677	CCL5+CHO-K1+HS	44AANA47-CCL5+CHO-K1
					W	1	0.8777	0.9981	1	0.7965	1
					P value	0.9955	0.3176	0.9174	0.999	0.1062	>0.9999
