# Supplementary material for: Heparan sulfate-dependent phase separation of CCL5 and its chemotactic activity
Source: eLife journal article supplement (doi:10.7554/elife.93871), 2024-03-04
Supplement: fig4-data1 [file Figure 4-source data 1.xlsx]

## Sheet: Sheet1
Figure 4-Source Data 1
Figure 4C FRAP of the condensates formed by CCL5-EGFP in HUVEC cell surface
Source Data
Replicate	1	2	3
Time(s)	Fluorescence recovery
0	100	100	100
5.188	0	0	0
7.78	9.03713	27.4595	2.4369
9.075	10.9267	26.2776	11.1836
10.371	13.1942	26.0599	13.0983
11.667	16.0861	35.3597	15.3177
12.963	10.3188	29.3568	15.3612
14.258	28.3273	25.2823	13.4247
15.554	26.5363	31.3785	8.26806
16.85	32.583	27.3973	8.00696
18.146	25.1232	27.024	10.7485
19.441	40.3221	21.9387	10.2045
20.737	42.2774	25.9043	5.04787
22.033	38.0381	19.2172	7.04961
23.328	36.0335	25.9666	7.44125
24.624	38.5146	23.4161	8.39861
25.92	35.6392	29.73	5.5483
27.216	36.1814	23.8049	14.2733
28.511	34.1604	16.7289	8.05048
29.807	38.6789	27.5683	11.1619
31.103	40.7	23.4317	10.6832
32.399	32.4187	24.9557	10.6179
33.694	41.2915	36.9926	11.6406
34.99	39.6648	21.9542	10.1175
36.286	44.627	26.2776	10.4874
37.581	42.9017	37.1636	7.37598
38.877	46.3523	30.041	7.68059
40.173	48.4883	40.5228	2.58921
41.469	58.7578	22.0631	12.9895
42.764	53.0726	35.624	14.3168
44.06	59.2343	24.8468	11.9017
45.356	66.9405	17.9731	19.2776
46.652	54.4364	23.9604	18.4291
47.947	57.5583	22.4364	13.6858
49.243	54.1735	24.9401	15.0783
50.539	48.1761	24.3181	21.1488
51.835	54.2557	21.7521	19.1036
53.13	58.9714	13.3232	20.322
54.426	52.6454	34.1933	15.3829
55.722	46.6645	28.9835	19.5822
57.017	43.559	19.2016	20.148
58.313	48.8663	30.6475	21.6928
59.609	55.0937	27.0396	24.0644
60.905	55.5373	33.2291	22.4761
62.2	57.9198	41.7824	20.8224
63.496	50.2465	37.1481	26.0444
64.792	55.7673	44.0996	24.5213
66.088	61.9619	34.3333	27.0017
67.383	45.1692	37.6613	22.1497
68.679	48.0611	47.9408	24.6736
69.975	47.8475	46.7745	26.6971
71.27	54.65	47.2566	29.3734
72.566	53.8449	43.8663	29.134
73.862	53.2862	52.4352	27.3934
75.158	51.0023	39.7296	28.3072
76.453	56.1781	48.9517	27.2193
77.749	49.4085	49.4493	29.9608
