# Supplementary material for: Heparan sulfate-dependent phase separation of CCL5 and its chemotactic activity
Source: eLife journal article supplement (doi:10.7554/elife.93871), 2024-03-04
Supplement: fig4-data2 [file Figure 4-source data 2.xlsx]

## Sheet: Sheet1
Figure 4-Source Data 2
Figure 4E Quantification of the fluorescence intensity shows decreased signals of CCL5-EGFP as the distance from the source cells increased
Source Data					Normalized concentration
Distance	Gray_Value				Replicate
0	4.02083		x(*100um)	Err.Bar	1	2	3
0.005	1.60967		0	0	1	1	1
0.01	4.97671		0.1967	0.1455	0.814	0.854	0.797
0.015	3.85134		1.112	0.3287	0.711	0.737	0.602
0.02	2.31539		2.192	0.4611	0.541	0.66	0.497
0.025	3.65888		2.836	0.5552	0.348	0.417	0.343
0.03	2.35139		4.697	0.3907	0.133	0.237	0.092
0.035	0.053386		5.167	0.2173	0.088	0.022	0.082
0.04	1.09943
0.045	1.4
0.05	0.748232
0.055	1.37337
0.06	2.20909
0.065	0.818539
0.07	0.122103
0.075	0.107892
0.08	0.319136
0.085	1.41223
0.09	0.155404
0.095	0.628406
0.1	1.55776
0.105	6.30894
0.11	4.21975
0.115	5.04368
0.12	4.62512
0.125	1.33601
0.13	4.59365
0.135	3.63776
0.14	0.895383
0.145	1.61515
0.15	1.18649
0.155	0.088473
0.16	0.029424
0.165	4.32203
0.17	6.98001
0.175	6.57076
0.18	9.63984
0.185	8.35885
0.19	6.55248
0.195	2.48595
0.2	1.13098
0.205	1.2368
0.21	0.629919
0.215	1.49302
0.22	1.50974
0.225	0.0625
0.23	0.076116
0.235	1.66204
0.24	2.05185
0.245	0.983081
0.25	0.965575
0.255	2.09306
0.26	1.23159
0.265	2.78811
0.27	1.57682
0.275	1.50375
0.28	1.70561
0.285	0.513012
0.29	0.888194
0.295	0.157213
0.3	2.66927
0.305	3.65188
0.31	1.1207
0.315	0.840234
0.32	0.642747
0.325	2.07285
0.33	3.27421
0.335	2.21809
0.34	1.36244
0.345	0.14696
0.35	0.540425
0.355	1.41607
0.36	4.55938
0.365	3.03132
0.37	1.7034
0.375	6.6394
0.38	6.6598
0.385	2.71137
0.39	2.27513
0.395	0.195292
0.4	0.791152
0.405	1.77391
0.41	4.32276
0.415	2.45716
0.42	0.602633
0.425	1.90511
0.43	3.07118
0.435	5.00237
0.44	4.38074
0.445	3.00915
0.45	0.679688
0.455	3.64067
0.46	3.08148
0.465	2.07273
0.47	2.69766
0.475	10.0013
0.48	9.96898
0.485	7.89478
0.49	3.59974
0.495	4.57767
0.5	3.84
0.505	8.26156
0.51	7.48235
0.515	9.17795
0.52	11.3058
0.525	7.11201
0.53	11.9618
0.535	10.3053
0.54	7.73047
0.545	7.69621
0.55	6.70757
0.555	1.89113
0.56	0.296296
0.565	0.578867
0.57	0.802083
0.575	0.067253
0.58	0.038056
0.585	0.50415
0.59	1.06288
0.595	0.912847
0.6	0.329282
0.605	1.11105
0.61	4.36909
0.615	1.20123
0.62	1.42551
0.625	0.129712
0.63	2.68503
0.635	0.619133
0.64	1.3267
0.645	0.862813
0.65	1.93355
0.655	4.38298
0.66	2.84907
0.665	0.780036
0.67	3.57746
0.675	6.94076
0.68	2.0219
0.685	1.25021
0.69	0.151071
0.695	1.04154
0.7	1.01108
0.705	0.34749
0.71	0.507976
0.715	0.288337
0.72	0.35
0.725	0.353277
0.73	3.44072
0.735	5.64385
0.74	12.8882
0.745	19.1119
0.75	9.89247
0.755	4.31872
0.76	1.16896
0.765	1.18729
0.77	1.09663
0.775	0.139736
0.78	0.828212
0.785	0.038029
0.79	0.587963
0.795	0.94154
0.8	0.058128
0.805	0
0.81	0.174023
0.815	0.000744
0.82	0
0.825	0
0.83	0.129742
0.835	0.106645
0.84	1.42037
0.845	4.00994
0.85	6.08519
0.855	8.32656
0.86	9.2402
0.865	2.59009
0.87	3.2841
0.875	6.29976
0.88	10.7317
0.885	4.65907
0.89	8.19598
0.895	9.32958
0.9	3.83073
0.905	5.32069
0.91	3.08577
0.915	2.97294
0.92	0.952045
0.925	2.53105
0.93	2.66259
0.935	8.11184
0.94	4.46876
0.945	5.0877
0.95	7.26695
0.955	8.49093
0.96	6.30417
0.965	2.93917
0.97	4.928
0.975	1.36116
0.98	1.79226
0.985	2.26577
0.99	1.68724
0.995	0.822663
1	1.6949
1.005	4.02064
1.01	1.28401
1.015	1.69067
1.02	0.274855
1.025	0.742258
1.03	1.40895
1.035	0.086133
1.04	0.058436
1.045	0.107646
1.05	3.69477
1.055	6.0777
1.06	1.4016
1.065	0
1.07	0.926664
1.075	2.65131
1.08	1.45417
1.085	2.06884
1.09	6.1271
1.095	6.00072
1.1	3.6482
1.105	3.21698
1.11	3.63824
1.115	7.87575
1.12	12.2941
1.125	17.5552
1.13	9.1009
1.135	7.09808
1.14	11.6913
1.145	3.02797
1.15	4.12249
1.155	4.61775
1.16	4.65773
1.165	2.945
1.17	4.15221
1.175	3.56248
1.18	0.932112
1.185	2.05988
1.19	3.09171
1.195	1.56588
1.2	1.55556
1.205	1.47873
1.21	2.32373
1.215	1.24232
1.22	2.81652
1.225	2.43507
1.23	1.82692
1.235	0.538276
1.24	0.879141
1.245	1.08085
1.25	3.39509
1.255	3.57731
1.26	0.416146
1.265	0.117594
1.27	2.65881
1.275	3.78065
1.28	2.45
1.285	3.78803
1.29	4.35465
1.295	2.94549
1.3	4.58526
1.305	8.95638
1.31	8.18539
1.315	15.2714
1.32	10.2375
1.325	4.29396
1.33	7.05114
1.335	5.57487
1.34	3.82668
1.345	1.41915
1.35	1.47428
1.355	2.38848
1.36	0.977778
1.365	0.208775
1.37	3.15957
1.375	4.79409
1.38	4.26681
1.385	6.81072
1.39	7.36875
1.395	1.95321
1.4	6.24235
1.405	6.05893
1.41	4.44117
1.415	5.15869
1.42	4.46357
1.425	3.38662
1.43	5.34528
1.435	4.21635
1.44	1.35417
1.445	4.64063
1.45	10.5654
1.455	18.7063
1.46	15.3323
1.465	12.8572
1.47	11.6292
1.475	13.0864
1.48	13.4658
1.485	14.5504
1.49	5.15419
1.495	2.04374
1.5	1.18475
1.505	0.122543
1.51	1.93616
1.515	1.7916
1.52	1.36955
1.525	0.060434
1.53	1.56608
1.535	1.41035
1.54	2.33531
1.545	2.20103
1.55	0.624449
1.555	2.8277
1.56	2.40521
1.565	1.82889
1.57	2.5878
1.575	1.78133
1.58	1.38307
1.585	0.684
1.59	1.22333
1.595	0.248878
1.6	0.694444
1.605	1.56764
1.61	2.54646
1.615	3.6794
1.62	4.89141
1.625	8.32953
1.63	2.75146
1.635	2.51168
1.64	0.466924
1.645	1.00528
1.65	0.681568
1.655	0.810866
1.66	2.26189
1.665	0.219548
1.67	1.61289
1.675	4.95271
1.68	0.168519
1.685	4.13408
1.69	2.41423
1.695	0.763023
1.7	2.22479
1.705	2.37452
1.71	0.25
1.715	2.14352
1.72	2.68324
1.725	5.03248
1.73	2.49178
1.735	1.56425
1.74	2.56236
1.745	1.61974
1.75	5.33122
1.755	2.69451
1.76	2.49573
1.765	7.17932
1.77	3.49783
1.775	4.32156
1.78	5.27538
1.785	0.840967
1.79	0.606481
1.795	1.47826
1.8	0.458333
1.805	0.641221
1.81	0
1.815	0
1.82	1.3813
1.825	3.7819
1.83	5.82684
1.835	1.97435
1.84	1.90864
1.845	5.10308
1.85	5.27434
1.855	3.25675
1.86	1.83388
1.865	1.24405
1.87	2.04837
1.875	0.771828
1.88	1.45853
1.885	1.2659
1.89	2.46139
1.895	1.2617
1.9	1.77916
1.905	5.52609
1.91	2.52498
1.915	3.56522
1.92	6.14583
1.925	5.78014
1.93	3.84876
1.935	6.01514
1.94	13.131
1.945	11.1286
1.95	2.43298
1.955	3.22808
1.96	1.81794
1.965	0.511514
1.97	1.07057
1.975	3.00376
1.98	3.77292
1.985	2.53119
1.99	4.30281
1.995	3.93725
2	6.67387
2.005	7.42506
2.01	10.3568
2.015	9.39478
2.02	10.0265
2.025	22.1622
2.03	21.3056
2.035	19.201
2.04	30.8178
2.045	24.8002
2.05	17.8378
2.055	15.6009
2.06	14.1162
2.065	14.6427
2.07	14.0506
2.075	6.87813
2.08	2.00046
2.085	2.88825
2.09	5.45163
2.095	5.42037
2.1	6.44994
2.105	7.82612
2.11	8.44949
2.115	6.44339
2.12	0.981134
2.125	0.098533
2.13	3.32787
2.135	3.15158
2.14	0.828813
2.145	0
2.15	1.21499
2.155	2.91963
2.16	1.73333
2.165	3.09917
2.17	1.54137
2.175	0.875172
2.18	1.22838
2.185	1.66047
2.19	5.22515
2.195	3.24785
2.2	4.40741
2.205	2.78459
2.21	3.59125
2.215	2.41718
2.22	4.40269
2.225	1.31975
2.23	1.07602
2.235	1.77595
2.24	3.01096
2.245	1.81668
2.25	3.6263
2.255	3.44064
2.26	5.99958
2.265	3.36059
2.27	5.0438
2.275	2.32697
2.28	5.75486
2.285	1.91964
2.29	2.30777
2.295	3.02438
2.3	2.00299
2.305	3.66094
2.31	3.92179
2.315	0.164794
2.32	0.496502
2.325	1.45393
2.33	1.71565
2.335	2.26864
2.34	2.13125
2.345	2.18204
2.35	0.029096
2.355	1.21418
2.36	7.72501
2.365	8.09599
2.37	2.41839
2.375	3.15302
2.38	2.74285
2.385	2.66436
2.39	3.65414
2.395	1.08992
2.4	1.4838
2.405	0.734731
2.41	0.526991
2.415	1.35801
2.42	1.58468
2.425	1.67739
2.43	3.94368
2.435	7.00097
2.44	1.93391
2.445	3.56463
2.45	3.93965
2.455	0.117719
2.46	1.33168
2.465	2.15349
2.47	2.23841
2.475	3.6805
2.48	2.71358
2.485	6.89628
2.49	18.0728
2.495	17.4454
2.5	8.65432
2.505	8.03437
2.51	3.07145
2.515	5.79779
2.52	1.0125
2.525	0.062273
2.53	1.92814
2.535	1.41809
2.54	0.965278
2.545	0.358967
2.55	0.623011
2.555	1.20602
2.56	0.259259
2.565	0.229883
2.57	1.38028
2.575	0.228366
2.58	1.11195
2.585	3.79581
2.59	6.81016
2.595	8.4719
2.6	4.12082
2.605	0.380662
2.61	2.20521
2.615	1.82295
2.62	2.31343
2.625	1.86441
2.63	4.75988
2.635	3.13141
2.64	2.27037
2.645	2.31738
2.65	1.80648
2.655	1.26131
2.66	0.545239
2.665	3.17064
2.67	3.15262
2.675	3.46449
2.68	4.61003
2.685	3.84027
2.69	4.1272
2.695	0.963745
2.7	0.169271
2.705	0.547867
2.71	1.76982
2.715	2.03617
2.72	2.19079
2.725	2.50842
2.73	2.49379
2.735	0.303973
2.74	0.731369
2.745	2.41956
2.75	1.04531
2.755	2.03108
2.76	2.34144
2.765	0.432142
2.77	1.6827
2.775	1.42893
2.78	1.41959
2.785	1.2119
2.79	0.786328
2.795	0.578904
2.8	3.63786
2.805	2.02672
2.81	0.985298
2.815	0.116291
2.82	0.376534
2.825	0.488412
2.83	1.92017
2.835	1.11304
2.84	1.01637
2.845	0.903535
2.85	0.642542
2.855	1.19527
2.86	2.96296
2.865	2.55262
2.87	1.31547
2.875	2.19907
2.88	1.21667
2.885	1.93899
2.89	4.09796
2.895	5.12588
2.9	2.2133
2.905	0.997338
2.91	1.47383
2.915	3.8542
2.92	4.62267
2.925	5.42163
2.93	2.79207
2.935	0.689969
2.94	4.01583
2.945	5.7473
2.95	1.98006
2.955	0.973011
2.96	1.02819
2.965	1.20494
2.97	1.20488
2.975	1.03865
2.98	2.37382
2.985	1.27237
2.99	0.151996
2.995	2.02819
3	0.822917
3.005	1.77091
3.01	3.97199
3.015	5.4592
3.02	7.36063
3.025	1.75859
3.03	1.28652
3.035	1.8109
3.04	1.85129
3.045	0.876926
3.05	1.85467
3.055	1.8792
3.06	2.29635
3.065	3.48014
3.07	1.32279
3.075	3.53378
3.08	5.84873
3.085	11.3404
3.09	5.40872
3.095	5.07722
3.1	2.28913
3.105	1.98605
3.11	5.98057
3.115	9.8503
3.12	4.4
3.125	0
3.13	1.26775
3.135	4.21282
3.14	1.00495
3.145	1.59614
3.15	5.13769
3.155	5.8657
3.16	9.11899
3.165	18.618
3.17	30.5986
3.175	32.2294
3.18	27.3088
3.185	26.603
3.19	22.1149
3.195	12.1651
3.2	16.4308
3.205	8.02196
3.21	11.1073
3.215	20.8413
3.22	24.081
3.225	20.9642
3.23	17.0803
3.235	14.2154
3.24	27.2302
3.245	23.9489
3.25	17.0579
3.255	35.321
3.26	30.8537
3.265	19.2852
3.27	28.202
3.275	12.6289
3.28	3.61831
3.285	6.28783
3.29	1.17276
3.295	0.218251
3.3	1.13397
3.305	0.85927
3.31	5.04517
3.315	3.03272
3.32	1.93048
3.325	0.832971
3.33	2.46999
3.335	2.74992
3.34	2.2747
3.345	2.96992
3.35	1.37192
3.355	1.38292
3.36	2.29167
3.365	1.30747
3.37	1.21019
3.375	0.122721
3.38	1.37855
3.385	1.04592
3.39	0.383572
3.395	1.05178
3.4	2.62879
3.405	2.40174
3.41	0.2621
3.415	1.15463
3.42	2.60078
3.425	1.11372
3.43	1.05384
3.435	1.56029
3.44	1.41564
3.445	2.79575
3.45	2.64735
3.455	3.44163
3.46	1.5543
3.465	1.18081
3.47	0.795698
3.475	1.72528
3.48	0.927662
3.485	2.57235
3.49	1.62399
3.495	12.4414
3.5	22.5806
3.505	37.1344
3.51	43.6782
3.515	47.143
3.52	36.3679
3.525	31.5645
3.53	26.2325
3.535	20.6723
3.54	36.114
3.545	37.4581
3.55	43.5216
3.555	39.3944
3.56	21.4856
3.565	17.3512
3.57	10.6589
3.575	4.28389
3.58	1.56998
3.585	0
3.59	0.156303
3.595	0.328659
3.6	1.5
3.605	2.32783
3.61	0.404131
3.615	0.529393
3.62	1.38016
3.625	3.45268
3.63	0.44728
3.635	0.495962
3.64	0.084761
3.645	1.04556
3.65	0.788637
3.655	1.27845
3.66	1.40344
3.665	1.4464
3.67	4.20304
3.675	3.29198
3.68	4.5769
3.685	2.36098
3.69	2.23796
3.695	2.49777
3.7	2.5457
3.705	4.48703
3.71	7.11974
3.715	5.99425
3.72	7.07616
3.725	7.25799
3.73	3.80931
3.735	4.48118
3.74	1.11795
3.745	0.993479
3.75	1.35663
3.755	3.46803
3.76	2.93745
3.765	0.296369
3.77	1.91458
3.775	2.87579
3.78	0.223698
3.785	1.65715
3.79	1.95432
3.795	3.10303
3.8	3.52778
3.805	1.3463
3.81	1.41607
3.815	0.437211
3.82	5.18206
3.825	8.9891
3.83	8.80344
3.835	9.25785
3.84	3.35972
3.845	2.49208
3.85	5.66717
3.855	3.425
3.86	3.13561
3.865	9.26868
3.87	5.08268
3.875	3.77189
3.88	1.83974
3.885	3.33912
3.89	6.41368
3.895	3.59668
3.9	0.86603
3.905	1.65846
3.91	1.20791
3.915	1.20867
3.92	0.548148
3.925	1.07912
3.93	0.003848
3.935	1.51665
3.94	3.04007
3.945	7.34052
3.95	4.38938
3.955	7.05259
3.96	7.70104
3.965	12.5316
3.97	10.9312
3.975	2.83927
3.98	1.44735
3.985	6.46531
3.99	4.77402
3.995	7.99254
4	12.055
4.005	26.2646
4.01	24.9558
4.015	27.3973
4.02	22.6273
4.025	24.1935
4.03	11.2863
4.035	6.50487
4.04	5.88656
4.045	6.6403
4.05	7.27051
4.055	3.43226
4.06	0.620583
4.065	0.03893
4.07	2.905
4.075	3.23785
4.08	0.77037
4.085	0.583767
4.09	0.782329
4.095	0
4.1	0
4.105	0.458919
4.11	1.21218
4.115	0.794376
4.12	0.307407
4.125	0.446804
4.13	0.803998
4.135	1.80361
4.14	0.664844
4.145	0.747868
4.15	0.004176
4.155	2.85433
4.16	2.65592
4.165	3.13985
4.17	0.825058
4.175	0.801477
4.18	2.04197
4.185	0.617432
4.19	1.27645
4.195	1.90837
4.2	3.48611
4.205	0.972291
4.21	0.325106
4.215	0.261191
4.22	0.649978
4.225	1.97884
4.23	3.07852
4.235	2.25836
4.24	2.95247
4.245	5.50315
4.25	1.75444
4.255	4.98467
4.26	5.66415
4.265	4.99311
4.27	3.11815
4.275	2.74382
4.28	2.22344
4.285	3.91082
4.29	7.03823
4.295	8.21952
4.3	10.2666
4.305	3.93929
4.31	0.893519
4.315	1.16011
4.32	1.18333
4.325	0.754888
4.33	1.07274
4.335	0.11186
4.34	1.37078
4.345	0.822659
4.35	0.438513
4.355	3.13145
4.36	3.44693
4.365	1.7605
4.37	2.27686
4.375	2.13663
4.38	2.73712
4.385	6.17219
4.39	6.71098
4.395	3.27767
4.4	1.18518
4.405	0.238426
4.41	1.77266
4.415	0.67522
4.42	7.69832
4.425	2.45784
4.43	1.18406
4.435	0.64556
4.44	1.80926
4.445	1.02154
4.45	1.15581
4.455	5.01605
4.46	4.36211
4.465	3.66126
4.47	1.371
4.475	3.02886
4.48	1.40741
4.485	0.520077
4.49	0.309348
4.495	1.22973
4.5	6.64844
4.505	24.0176
4.51	7.43673
4.515	6.66865
4.52	6.85576
4.525	20.683
4.53	23.4848
4.535	22.226
4.54	19.1014
4.545	15.2537
4.55	13.0625
4.555	24.9377
4.56	22.9796
4.565	26.7881
4.57	22.3314
4.575	3.94349
4.58	6.71951
4.585	6.43616
4.59	3.95052
4.595	0.439158
4.6	0.931327
4.605	1.00569
4.61	2.58451
4.615	2.98216
4.62	2.89236
4.625	2.37332
4.63	0.651526
4.635	1.31857
4.64	3.89784
4.645	1.40505
4.65	1.87098
4.655	3.49624
4.66	3.70657
4.665	1.80466
4.67	1.88235
4.675	0.029514
4.68	0.703125
4.685	1.83058
4.69	0.066133
4.695	2.10535
4.7	1.72621
4.705	0.985585
4.71	7.4255
4.715	9.13029
4.72	14.7185
4.725	0.584717
4.73	4.58606
4.735	4.36972
4.74	3.92729
4.745	0.545254
4.75	3.19179
4.755	5.95781
4.76	9.70463
4.765	5.5112
4.77	0.894141
4.775	2.11328
4.78	3.2516
4.785	1.30192
4.79	0.617658
4.795	1.62694
4.8	0.793981
4.805	1.65209
4.81	0.01351
4.815	0.037891
4.82	0.810211
4.825	2.31102
4.83	1.298
4.835	0.208571
4.84	1.60179
4.845	0.762941
4.85	1.67643
4.855	1.13176
4.86	0.449219
4.865	0.803908
4.87	2.53162
4.875	1.57237
4.88	1.99774
4.885	0.654168
4.89	1.37823
4.895	0.438066
4.9	2.86224
4.905	2.25926
4.91	3.05893
4.915	0.473902
4.92	0.772454
4.925	0
4.93	0.454517
4.935	0.639771
4.94	1.34866
4.945	0.525331
4.95	1.60286
4.955	1.39301
4.96	1.39717
4.965	1.52307
4.97	3.43233
4.975	1.43703
4.98	0.201823
4.985	1.83596
4.99	3.26092
4.995	4.13488
5	4.99428
5.005	9.6737
5.01	8.25326
5.015	12.2049
5.02	8.23212
5.025	9.64069
5.03	3.06836
5.035	0.914303
5.04	3.33333
5.045	6.66628
5.05	3.83558
5.055	8.04859
5.06	5.68212
5.065	3.11857
5.07	4.22873
5.075	4.27777
5.08	1.39162
5.085	3.43589
5.09	3.45347
5.095	7.82083
5.1	7.07581
5.105	4.61998
5.11	7.72042
5.115	11.5443
5.12	4.27325
5.125	0.512063
5.13	3.5819
5.135	17.0278
5.14	4.32882
5.145	5.21432
5.15	5.76476
5.155	5.91026
5.16	6.52998
5.165	10.9337
5.17	7.84898
5.175	6.08415
5.18	3.69333
5.185	12.8604
5.19	9.80958
5.195	8.35716
5.2	7.54424
5.205	7.10376
5.21	8.38931
5.215	12.8838
5.22	18.5289
5.225	13.7022
5.23	15.7975
5.235	16.6277
5.24	18.8317
5.245	15.026
5.25	9.87059
5.255	13.7965
5.26	6.85544
5.265	2.91613
5.27	4.55683
5.275	2.51352
5.28	1.63935
5.285	0.899
5.29	0
5.295	0.724333
5.3	3.07012
5.305	0.786849
5.31	1.81133
5.315	3.82995
5.32	0.963593
5.325	0.623761
5.33	1.37811
5.335	2.34198
5.34	8.09447
5.345	12.404
5.35	7.55831
5.355	2.77788
5.36	0.217284
5.365	1.39151
5.37	1.54249
5.375	4.08238
5.38	8.92816
5.385	7.59109
5.39	1.51021
5.395	1.62485
5.4	1.74479
5.405	3.87859
5.41	3.36176
5.415	4.30242
5.42	5.39196
5.425	4.84488
5.43	0.938983
5.435	1.00851
5.44	2.39609
5.445	2.39181
5.45	3.95595
5.455	8.67197
5.46	5.02888
5.465	2.23489
5.47	2.33037
5.475	2.18553
5.48	0.617142
5.485	0.728049
5.49	2.33476
5.495	0.840025
5.5	0.394338
5.505	2.10637
5.51	0.644183
5.515	0.228727
5.52	0.422222
5.525	1.14274
5.53	0.8361
5.535	2.1069
5.54	2.6024
5.545	1.55181
5.55	1.1633
5.555	0.301359
5.56	3.15421
5.565	1.201
5.57	1.04602
5.575	5.74432
5.58	2.85521
5.585	4.12012
5.59	1.16829
5.595	1.21951
5.6	3.98225
5.605	1.51774
5.61	2.5134
5.615	1.39374
5.62	0.85762
5.625	1.60555
5.63	2.91347
5.635	1.69979
5.64	5.58704
5.645	3.75366
5.65	3.29713
5.655	2.17898
5.66	9.24337
5.665	15.6103
5.67	11.8255
5.675	10.5827
5.68	7.67078
5.685	7.76259
5.69	8.91933
5.695	7.9365
5.7	3.5706
5.705	7.3426
5.71	12.504
5.715	3.11414
5.72	1.17892
5.725	1.67741
5.73	0.954145
5.735	1.82975
5.74	4.3132
5.745	1.90975
5.75	1.79725
5.755	1.30715
5.76	1.82917
5.765	4.93524
5.77	5.43054
5.775	5.33734
5.78	2.15818
5.785	4.08172
5.79	4.66345
5.795	3.05027
5.8	0.74402
5.805	1.85221
5.81	1.36465
5.815	2.95125
5.82	5.09187
5.825	0.476728
5.83	0.413634
5.835	2.83234
5.84	3.54136
5.845	4.74593
5.85	5.67415
5.855	2.21262
5.86	3.39358
5.865	1.77105
5.87	1.32323
5.875	0.052542
5.88	0.093981
5.885	0.004319
5.89	1.58047
5.895	0.392204
5.9	0.354392
5.905	0.851699
5.91	0.755556
5.915	3.66188
5.92	2.23158
5.925	0.205304
5.93	1.58536
5.935	1.23393
5.94	3.66016
5.945	5.81945
5.95	1.84846
5.955	1.2308
5.96	7.01762
5.965	4.81893
5.97	0.993641
5.975	2.27759
5.98	6.72029
5.985	8.94889
5.99	14.6336
5.995	15.3892
6	12.3333
6.005	6.60665
6.01	3.78801
6.015	3.44814
6.02	4.51549
6.025	4.20742
6.03	3.43398
6.035	3.58567
6.04	6.67072
6.045	4.93516
6.05	1.61094
6.055	3.22468
6.06	5.18608
6.065	3.83538
6.07	1.71521
6.075	3.92725
6.08	6.70144
6.085	2.53319
6.09	3.34234
6.095	3.76973
6.1	0.761236
6.105	0.30123
6.11	2.12368
6.115	1.11712
6.12	0.854167
6.125	1.55613
6.13	5.58727
6.135	8.10883
6.14	7.1771
6.145	8.64231
6.15	4.3622
6.155	2.73972
6.16	2.40864
6.165	3.20736
6.17	6.22153
6.175	8.05496
6.18	10.8637
6.185	14.1789
6.19	9.16685
6.195	7.87963
6.2	2.27765
6.205	2.68003
6.21	1.98223
6.215	3.23787
6.22	3.2189
6.225	1.62038
6.23	0.09873
6.235	1.06337
6.24	1.09074
6.245	0.464726
6.25	7.91041
6.255	6.66038
6.26	5.87673
6.265	2.41549
6.27	1.86215
6.275	3.38753
6.28	5.05673
6.285	2.8243
6.29	1.66399
6.295	0.285578
6.3	0.957031
6.305	2.8948
6.31	1.37753
6.315	5.32915
6.32	2.32263
6.325	4.41323
6.33	4.76636
6.335	7.4852
6.34	8.51233
6.345	7.09609
6.35	12.2849
6.355	9.70116
6.36	6.17766
6.365	5.07366
6.37	6.7721
6.375	3.0983
6.38	2.76671
6.385	6.05484
6.39	3.53327
6.395	2.05981
6.4	1.23997
6.405	0.976297
6.41	0.314841
6.415	1.06916
6.42	1.15284
6.425	4.61952
6.43	3.66263
6.435	5.39906
6.44	4.98485
6.445	2.76141
6.45	0.22356
6.455	3.30363
6.46	2.20395
6.465	1.40023
6.47	5.66492
6.475	4.14445
6.48	3.45
6.485	3.80719
6.49	2.24703
6.495	2.00442
6.5	1.50744
6.505	1.59941
6.51	4.10048
6.515	2.69483
6.52	0.238825
6.525	1.38444
6.53	1.15627
6.535	0.971796
6.54	0.116898
6.545	1.25844
6.55	0.750932
6.555	1.96439
6.56	0.237912
6.565	1.0196
6.57	0.248568
6.575	0.907324
6.58	0.553537
6.585	0.583993
6.59	1.42467
6.595	4.38493
6.6	1.05961
6.605	1.85495
6.61	1.61201
6.615	0.729199
6.62	1.20893
6.625	0.189938
6.63	1.60695
6.635	0.510602
6.64	0.222222
6.645	0.98185
6.65	0.266987
6.655	0.367238
6.66	0.344531
6.665	0
6.67	0.632011
6.675	1.01142
6.68	0.050502
6.685	0
6.69	0
6.695	0.816839
6.7	0.761462
6.705	0.003418
6.71	0
6.715	0.719836
6.72	2.62546
6.725	0.704232
6.73	0.472659
6.735	0.076736
6.74	0.179588
6.745	0.113938
6.75	1.41504
6.755	1.55357
6.76	1.38434
6.765	1.25219
6.77	0.295145
6.775	1.85497
6.78	0.801997
6.785	1.82281
6.79	2.46087
6.795	0.662484
6.8	0
6.805	0.032269
6.81	0
6.815	0
6.82	0.216525
6.825	0.613968
6.83	0.4414
6.835	2.43981
6.84	0.995833
6.845	0.888452
6.85	0.572173
6.855	1.22206
6.86	1.88209
6.865	0.497464
6.87	0.672222
6.875	1.03188
6.88	0.459105
6.885	0.048665
6.89	0.725694
6.895	0.564236
6.9	0
6.905	0
6.91	0
6.915	0
6.92	0
6.925	0
6.93	0
6.935	0
6.94	0
6.945	0
6.95	0
6.955	0
6.96	0
6.965	0
6.97	0
6.975	0
6.98	0
6.985	0
6.99	0
6.995	0
7	0
7.005	0
7.01	0
7.015	0
7.02	0
7.025	0
7.03	0
7.035	0
7.04	0
7.045	0
7.05	0
7.055	0
7.06	0
7.065	0
7.07	0
7.075	0
7.08	0
7.085	0
7.09	0
7.095	0
7.1	0
7.105	0
7.11	0
7.115	0
7.12	0
7.125	0
7.13	0
7.135	0
7.14	0
7.145	0
7.15	0
7.155	0
7.16	0
7.165	0
7.17	0
7.175	0
7.18	0
7.185	0
7.19	0
7.195	0
7.2	0
