# Supplementary material for: Heparan sulfate-dependent phase separation of CCL5 and its chemotactic activity
Source: eLife journal article supplement (doi:10.7554/elife.93871), 2024-03-04
Supplement: fig4-data3 [file Figure 4-source data 3.xlsx]

## Sheet: Sheet1
				Figure 4-Soure Data 3
				Figure 4F Quantification of THP-1collected from the lower chamber
				Soure Data
				Replicate	Transfected CHO-K1	CHO-K1
				1	2099	864
				2	2346	494
				3	1852	243
				Descriptive statistics(arithmetic from GraphPad Prism8)
					Transfected CHO-K1	CHO-K1
				Number of values	3	3
				Minimum	1852	243
				Maximum	2346	864
				Range	494	621
				Mean	2099	533.7
				Std. Deviation	247	312.4
				Std. Error of Mean	142.6	180.4
				P value	0.0024
				Shapiro-Wilk test results(arithmetic from GraphPad Prism8)
					Transfected CHO-K1	CHO-K1
				W	1	0.9879
				P value	＞0.9999	0.7896
