# Supplementary material for: Heparan sulfate-dependent phase separation of CCL5 and its chemotactic activity
Source: eLife journal article supplement (doi:10.7554/elife.93871), 2024-03-04
Supplement: fig5-data1 [file Figure 5-source data1.xlsx]

## Sheet: Sheet1
			Figure 5-Source Data 1
			Figure 5 Transmigration of human peripheral blood cells
				Source Data
			Replicate	CCL5	CCL5+CHO K1	CCL5+CHO 677	CCL5+HUVEC
			1	1234	10493	3333	7901
			2	17530	47778	17777	48148
			3	7037	17407	10000	21852
