# Supplementary material for: Heparan sulfate-dependent phase separation of CCL5 and its chemotactic activity
Source: eLife journal article supplement (doi:10.7554/elife.93871), 2024-03-04
Supplement: fig6-data1 [file Figure 6-source data 1.xlsx]

## Sheet: Sheet1
				Figure 6-Source Data 1
				Figure 6 Chemokines phase separation promotes cell recruitment in vivo
				Source Data
				Replicate	CCL5	CCL5+Heparin	44AANA47-CCL5	Heparin	0.9%NaCl
				1	150	56.4	55.8	58.6	30.9	(*10^4)
				2	145	61	58.6	63.5	37.2
				3	117	80.2	82.6	50.1	43.8
				4	132	84	61.6	60.5	46
				Descriptive statistics(arithmetic from GraphPad Prism8)
					CCL5(*10^4)	CCL5+Heparin	44AANA47-CCL5	Heparin	0.9%NaCl
				Number of values	4	4	4	4	4
				Minimum	117	56.4	55.8	50.1	30.9
				Maximum	150	84	82.6	63.5	46
				Range	33	27.6	26.8	13.4	15.1
				Mean	136	70.4	64.65	58.18	39.48
				Std. Deviation	14.76	13.73	12.2	5.749	6.831
				Std. Error of Mean	7.382	6.864	6.099	2.874	3.415
				P value(vs. CCL5)		0.0006	0.0003
					Shapiro-Wilk test results(arithmetic from GraphPad Prism8)
					CCL5	CCL5+Heparin	44AANA47-CCL5
				W	0.9436	0.8688	0.8016
				P value	0.6765	0.2928	0.1052
